# Supplementary material for: RAG1 splicing mutation causes enhanced B cell differentiation and autoantibody production
Source: PubMed Central journal article supplement (PMC8525647; doi:10.1172/jci.insight.148887), 2021-10-08
Supplement: jciinsight-6-148887-s028.pdf [file jciinsight-6-148887-s028.pdf]

Exon 1

```
GAAACAAGAGGGCAAGGAGAGAGCAGAGAACACACTTTGCCTTCTCTTTGGTA
TTGAGTAATATCAACCAAATTGCAGACATCTCAACACTTTGGCCAGGCAGCCTG
CTGAGCAAGGGTACACTCATACTTTTCATGCCTCGAGCCGAAATATTTATTACAT
TTTTATGTTTCTAACTAGAAGTGCTTGAGCTTTTTTTTCCTTCCAGGTGATGAGGG
GATGGAATGAGCAAAGCTACATCAATTTTTTTTTAATGTATGAAAATAAAAAAGG
TACAAGAGGCCAAGTTTAGGGCCACTGAAGGTTCATAGAAAGATGCAAATATC
TGAATTACTATAAATGAATGCTATTGTCAGAGGAAAGGTTTAAGGAGTGCTTCTT
GAATGAATGTGTACAAATCAGCAGAAGGTACCTCAGCCAGCATGGCAGCCTCT
TTCCCACCCACCTTGGGACTCAGTTCTGCCCCAGATGAAATTCAGCACCCACAT
ATTAAATTTTCAGAATGGAAATTTAAGCTGTTCCGGGTGA
```

Exon 2

**Supplemental Figure 1** Product of the aberrantly spliced *RAG1* mRNA in the patient. The sequence includes the entire exon 1 (highlighted in grey), retained intron 1 (black) and part of exon 2 (highlighted in grey). The mutated nucleotide is shown in red. Eleven out-of-frame ATGs in intron 1 are underlined in red and an ATG in intron 1 that is in-frame with the authentic ATG (highlighted in blue) is underlined in black. Eleven premature stop codons are squared.

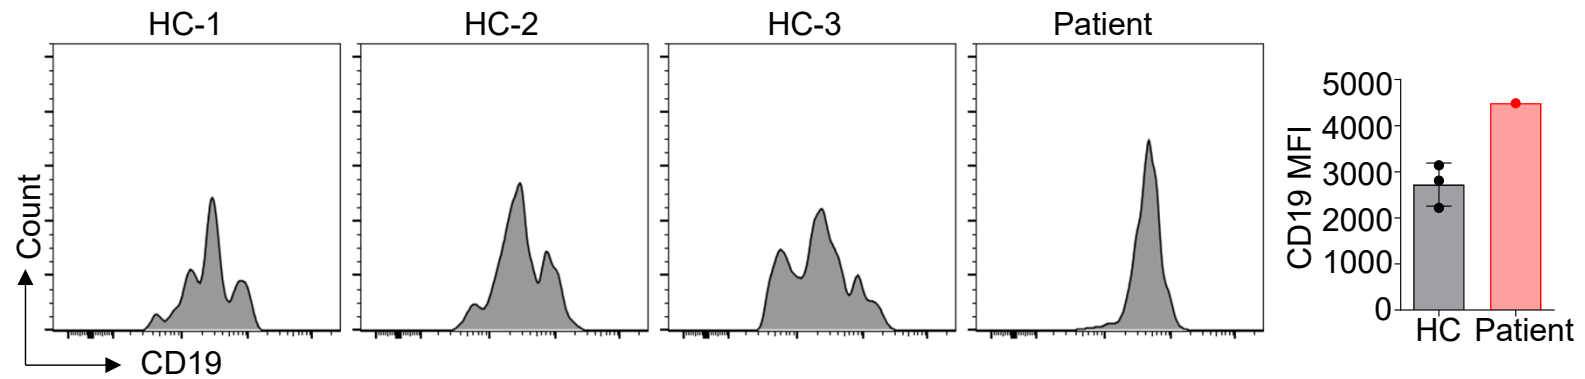

**Supplemental Figure 2** The patient IgD<sup>-</sup>CD27<sup>-</sup> DN B cells expressed higher levels of CD19 than did those from HC. The DN B cells from HC and the patient (Fig. 3B, lower panels) were analyzed for their CD19 expression.

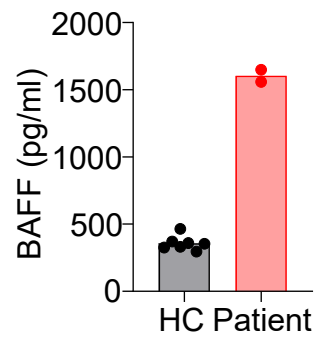

**Supplemental Figure 3** The patient serum contained an elevated level of BAFB than the sera from 7 HC. The concentration of BAFB was analyzed using ELISA. The patient sample was independently analyzed twice.

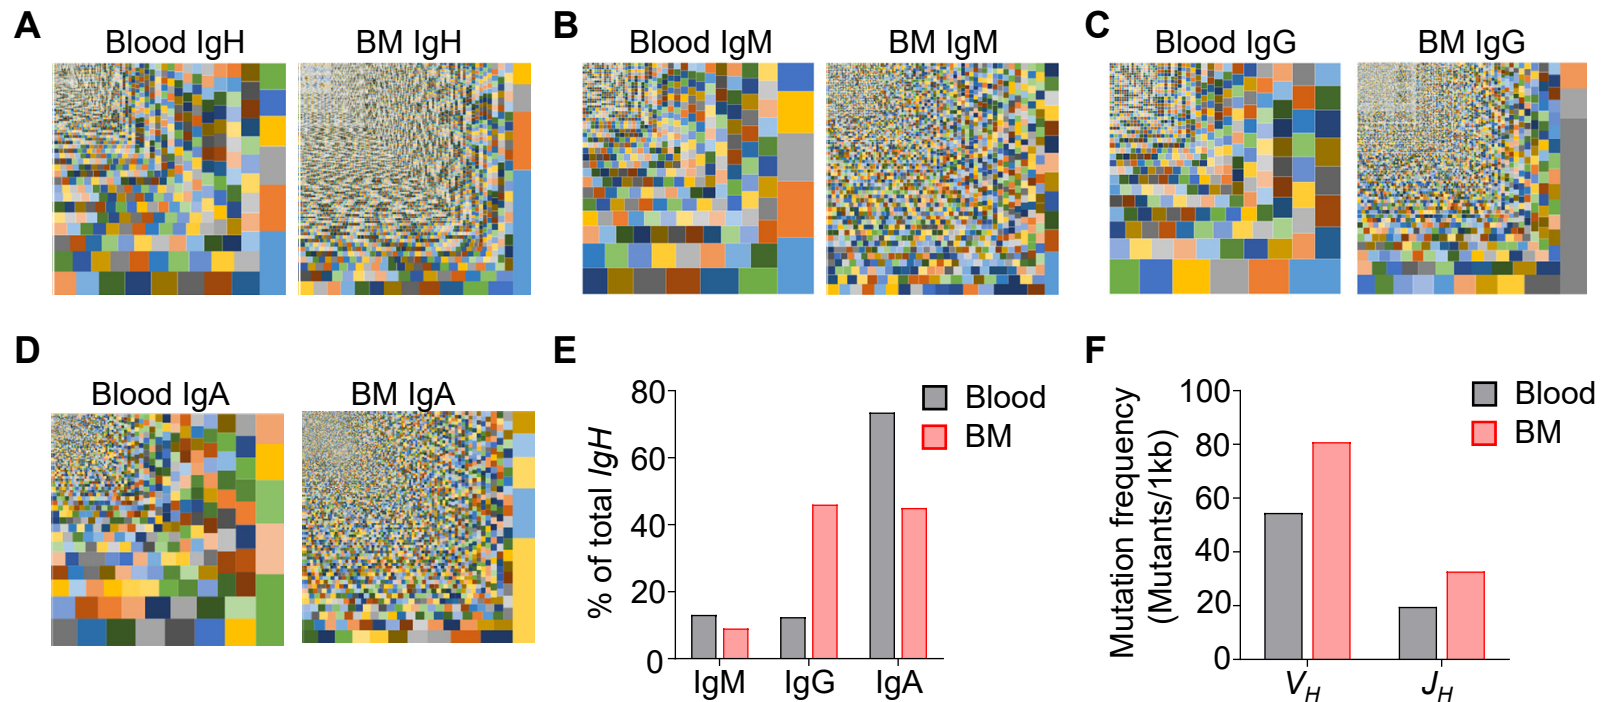

**Supplemental Figure 4 (A-D)** Tree maps showing CDR3 amino acid sequences from the patient peripheral blood and BM. (A) Total IgH, (B) IgM, (C) IgG and (D) IgA. Each rectangle represents a unique CDR3 amino acid sequence and the size of the rectangle represents the relative frequency of an individual CDR3. (E) Frequency of IgM, IgG and IgA sequences among all CDR3s in the patient peripheral blood and BM. (F) Mutation frequency in the  $V_H$  and  $J_H$  genes of the patient peripheral blood and BM.

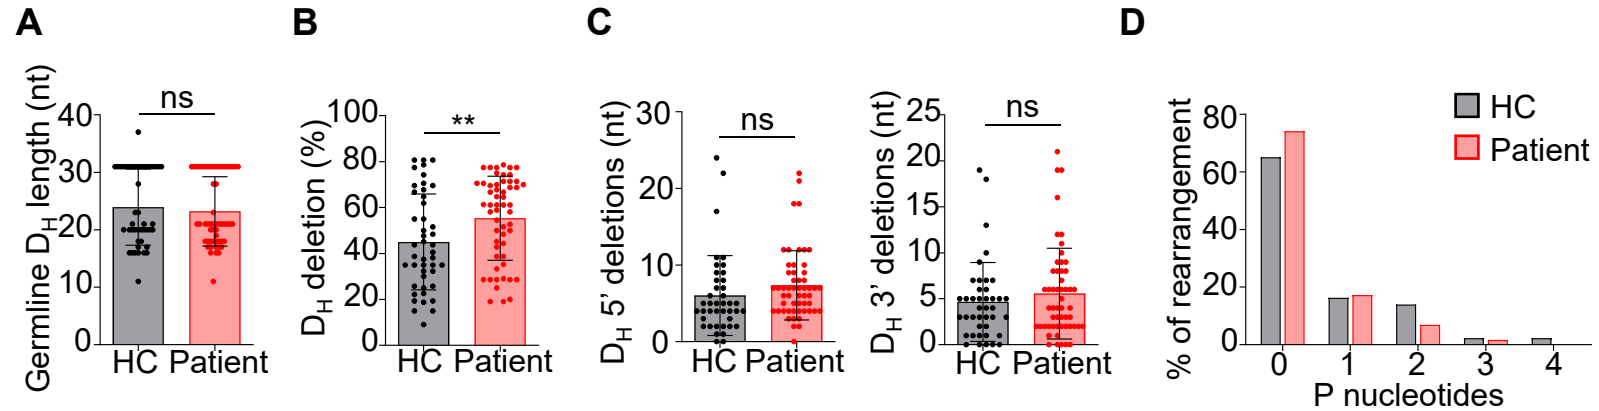

**Supplemental Figure 5** *IgH* CDR3 profiles in the BM. **(A)** Average length of the germline  $D_H$  segments used by the patient and HC. **(B)** Proportion of the deleted nucleotides (nt) from germline  $D_H$  segment. **(C)** Number of nt deleted from the 5' (left) and 3' (right) ends of the  $D_H$  segments in the patient and HC. **(D)** The distribution of P-nucleotide addition. Mean  $\pm$  SD is shown. \*\* $p < 0.01$ ; ns, not significant.

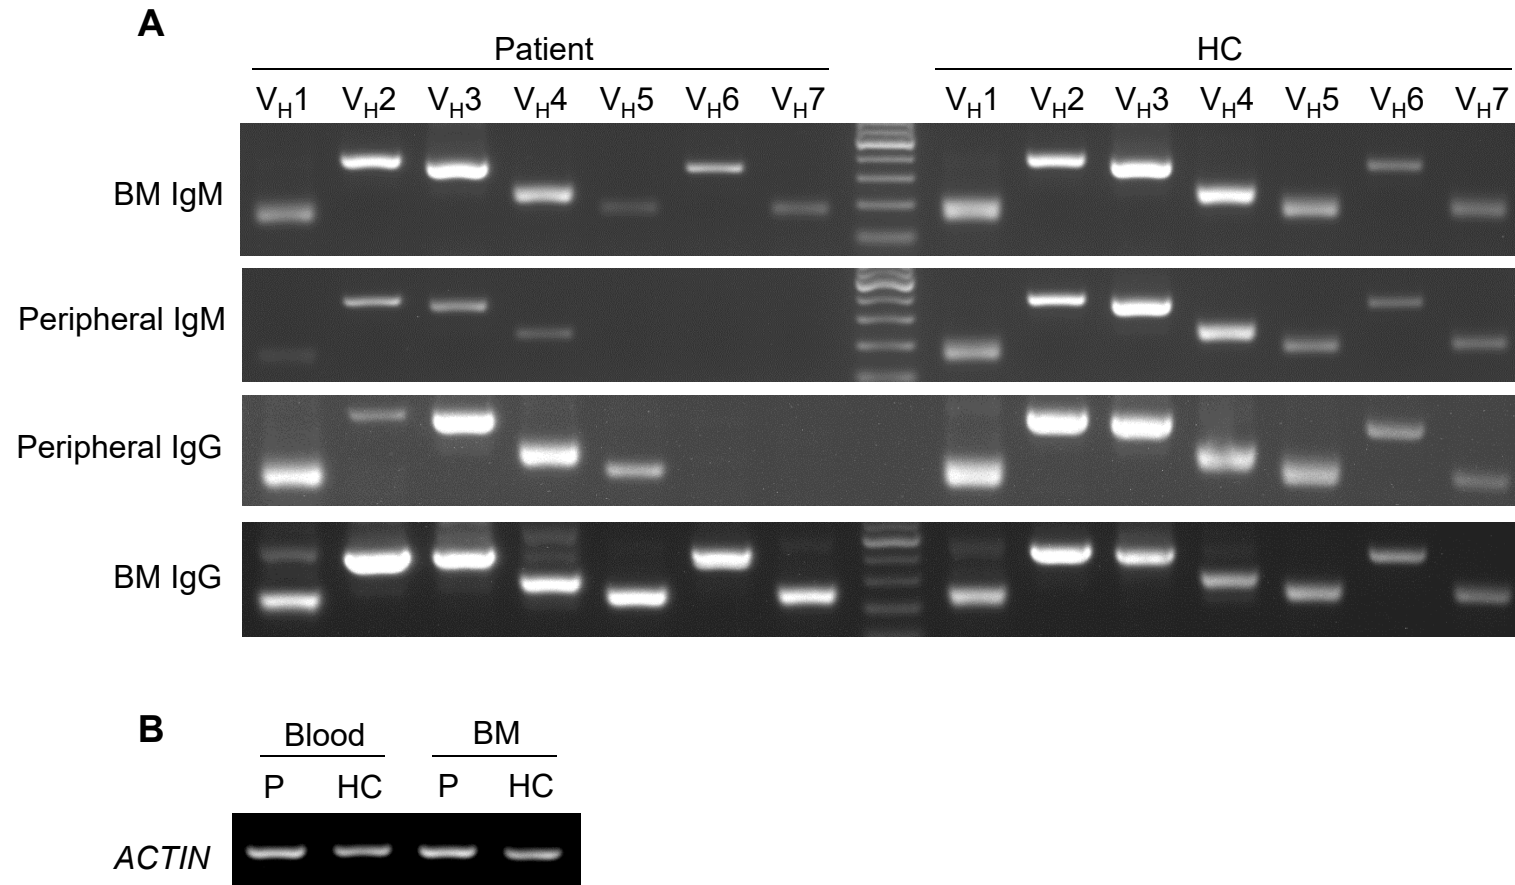

**Supplemental Figure 6** Amplification of  $V_H$  genes using cDNA derived from the BM and peripheral blood of the patient and HC. (A)  $V_H$ -specific forward primers and a C $\mu$  (for IgM) or a C $\gamma$  (for IgG) reverse primer were used for amplification. (B) As a control, the *ACTIN* gene was amplified from the same cDNA.

**Supplemental Table 1.** Serum Ig levels in the patient at age 7

| <b>IgG subclass</b> | <b>Value (g/L)</b> | <b>Reference (g/L)</b> |
|---------------------|--------------------|------------------------|
| IgG <sub>1</sub>    | 20.5               | 3.77-11.31             |
| IgG <sub>2</sub>    | 1.02               | 0.68-3.88              |
| IgG <sub>3</sub>    | 0.945              | 0.158-0.890            |
| IgG <sub>4</sub>    | 0.0687             | 0.012-1.699            |

**Supplemental Table 2. Clinical and immunological features of the PID cohort**

|         | Sex | Age   | Genetic defects | Clinical features                             | B cell (cells/ul) | Reference values | T cell (cells/ul) | Reference values | Naive B (% of CD19 <sup>+</sup> ) | Naive B (cells/ul) | DN B (% of CD19 <sup>+</sup> ) | DN B (cells/ul) | Memory B (% of CD19 <sup>+</sup> ) | Memory B (cells/ul) | IgG (g/L)          | Reference values | IgM (g/L) | Reference values | IgA (g/L) | Reference values | Auto-antibody      |
|---------|-----|-------|-----------------|-----------------------------------------------|-------------------|------------------|-------------------|------------------|-----------------------------------|--------------------|--------------------------------|-----------------|------------------------------------|---------------------|--------------------|------------------|-----------|------------------|-----------|------------------|--------------------|
| PID001* | M   | 8Y    | RAG1            | Fever; infections; granulomas                 | 4                 | 300-600          | 14                | 1100-2200        | 17.3                              | 0.60896            | 59.5                           | 2.38            | 22.1                               | 0.884               | 32.1               | 6.09-12.85       | 2.73      | 0.67-2.01        | 2.06      | 0.52-2.16        | ANA, pANCA, Coombs |
| PID002  | M   | 9M    | RAG1            | Recurrent infections                          | 801               | 300-800          | 1958              | 1800-3300        | 70.9                              | 567.909            | 7.1                            | 56.871          | 11.8                               | 94.518              | 14.66              | 3.50-8.90        | 3.38      | 0.36-1.20        | 1.12      | 0.06-0.54        | Coombs             |
| PID003  | M   | 11Y   | PIK3R1          | CVID                                          | 32                | 300-600          | 796               | 1100-2200        | 42.3                              | 13.71789           | 54.8                           | 17.536          | 2.54                               | 0.8128              | 0.54               | 6.09-12.85       | 0.1       | 0.67-2.01        | 0.14      | 0.52-2.16        | SSA                |
| PID004* | F   | 1Y5M  | Unknown         | Recurrent infections                          | 397               | 300-600          | 1984              | 1900-2900        | 12.1                              | 48.037             | 13.9                           | 55.183          | 71                                 | 281.87              | 38.5               | 5.52-11.46       | 2.98      | 0.60-2.12        | 1.65      | 0.06-0.74        | ANA                |
| PID005* | F   | 4Y4M  | Unknown         | Eosinophilia                                  | 739               | 300-600          | 1812              | 1900-2900        | 7.97                              | 58.8983            | 77.4                           | 571.986         | 14.3                               | 105.677             | 24.35              | 4.95-12.74       | 1.08      | 0.65-2.01        | 1.65      | 0.33-1.89        | SSB                |
| PID006  | M   | 4Y9M  | PIK3CD          | Recurrent fever and diarrhea                  | 211               | 300-600          | 1303              | 1500-2900        | 76.8                              | 162.048            | 8.01                           | 16.9011         | 13.6                               | 28.696              | 19 <sup>#</sup>    | 4.95-12.74       | 3.85      | 0.65-2.01        | 1.54      | 0.33-1.89        | PR3, GBM           |
| PID007  | M   | 13Y   | Unknown         | Hypogammaglobulinemia                         | 303               | 300-600          | 1282              | 1100-2200        | 84.7                              | 256.641            | 6.12                           | 18.5436         | 5.32                               | 16.1196             | 5 <sup>#</sup>     | 6.98-14.26       | 1.54      | 0.56-2.16        | 2.09      | 0.92-2.50        | (-)                |
| PID008  | F   | 13Y   | TNFRF13B        | Thrombocytopenic                              | 301               | 300-500          | 680               | 1300-2200        | 74.6                              | 224.546            | 6.86                           | 20.6486         | 11.4                               | 34.314              | 10.79 <sup>#</sup> | 6.98-14.26       | 0.54      | 0.56-2.16        | 1.32      | 0.92-2.50        | (-)                |
| PID009  | M   | 16Y   | Unknown         | CVID                                          | 203               | 300-600          | 759               | 1100-2200        | 93.9                              | 190.617            | 1.78                           | 3.6134          | 1.06                               | 2.1518              | ND                 | 7.54-16.62       | 0.02      | 0.72-2.28        | 0.05      | 0.89-3.24        | (-)                |
| PID010  | M   | 5Y6M  | Unknown         | Recurrent fever; encephalopathy               | 494               | 300-600          | 2112              | 1500-2900        | 90.6                              | 447.564            | 3.95                           | 19.513          | 3.21                               | 15.8574             | 9.68 <sup>#</sup>  | 4.95-12.74       | 0.82      | 0.65-2.01        | 1.65      | 0.33-1.89        | (-)                |
| PID011  | M   | 15Y   | PIK3CD          | Hyper IgM syndrome                            | 169               | 300-600          | 909               | 1100-2200        | 66.5                              | 112.385            | 17.5                           | 29.575          | 5.69                               | 9.6161              | 5.26 <sup>#</sup>  | 7.54-16.62       | 18.3      | 0.72-2.28        | 0.99      | 0.89-3.24        | (-)                |
| PID012  | F   | 9M    | Unknown         | Thrombocytopenic; agranulocytosis             | 1307              | 300-800          | 3371              | 2800-3500        | 95.1                              | 1242.957           | 0.92                           | 12.0244         | 1.44                               | 18.8208             | 19.37              | 3.50-8.90        | 0.46      | 0.36-1.20        | 0.11      | 0.06-0.54        | (-)                |
| PID013  | F   | 4Y8M  | PIK3CD          | Hypogammaglobulinemia; lymphadenopathy        | 36                | 300-600          | 746               | 1900-2900        | 42                                | 15.12              | 48.3                           | 17.388          | 7.91                               | 2.8476              | 3.04 <sup>#</sup>  | 4.95-12.74       | 11.06     | 0.65-2.01        | 0.24      | 0.33-1.89        | (-)                |
| PID014  | M   | 4Y4M  | PIK3CD          | APDS                                          | 278               | 300-600          | 1138              | 1500-2900        | 80.5                              | 223.79             | 10.6                           | 29.468          | 6.66                               | 18.5148             | 9.15 <sup>#</sup>  | 4.95-12.74       | 3.82      | 0.65-2.01        | 0.55      | 0.33-1.89        | (-)                |
| PID015  | M   | 2Y    | Unknown         | Recurrent fever and diarrhea                  | 310               | 300-600          | 2696              | 1500-2900        | 80.2                              | 248.62             | 7.23                           | 22.413          | 11.6                               | 35.96               | 19.9 <sup>#</sup>  | 5.52-11.46       | 1.25      | 0.60-2.12        | 2.97      | 0.06-0.74        | (-)                |
| PID016  | M   | 5Y4M  | Unknown         | Recurrent fever                               | 285               | 300-600          | 901               | 1500-2900        | 77.7                              | 221.445            | 8.46                           | 24.111          | 10                                 | 28.5                | 9.68               | 4.95-12.74       | 0.96      | 0.65-2.01        | 2.31      | 0.33-1.89        | (-)                |
| PID017  | M   | 3M    | WAS             | WAS                                           | 301               | 300-800          | 2143              | 1800-3300        | 91.3                              | 274.813            | 2.95                           | 8.8795          | 2.43                               | 7.3143              | 21.58              | 3.70-8.30        | 0.31      | 0.33-1.25        | 0.39      | 0.14-0.50        | (-)                |
| PID018  | M   | 11Y   | Unknown         | Recurrent fever; Chronic EBV infection        | 168               | 300-600          | 845               | 1100-2200        | 37.1                              | 62.328             | 59.6                           | 100.128         | 2.77                               | 4.6536              | 13.28 <sup>#</sup> | 6.09-12.85       | 0.36      | 0.67-2.01        | 2.2       | 0.52-2.16        | (-)                |
| PID019  | M   | 2Y    | Unknown         | agammaglobulinemia                            | 12                | 300-600          | 880               | 1500-2900        | 19.3                              | 2.35074            | 80                             | 9.6             | 0.57                               | 0.0684              | 8.05               | 5.52-11.46       | 0.12      | 0.60-2.12        | 0.29      | 0.06-0.74        | (-)                |
| PID020  | F   | 7Y    | PIK3CD          | Recurrent pulmonary infections; EBV infection | 152               | 300-500          | 1052              | 1300-2200        | 63.5                              | 96.52              | 30.5                           | 46.36           | 5.01                               | 7.6152              | 11.62 <sup>#</sup> | 6.09-12.85       | 3.81      | 0.67-2.01        | 1.32      | 0.52-2.16        | (-)                |
| PID021  | F   | 3Y3M  | Unknown         | Recurrent pulmonary infections                | 935               | 300-600          | 2781              | 1900-2900        | 91.4                              | 854.59             | 3.01                           | 28.1435         | 2.84                               | 26.554              | 6.92               | 4.95-12.74       | 11.53     | 0.65-2.01        | 0.44      | 0.33-1.89        | (-)                |
| PID022  | M   | 10Y   | Unknown         | CVID                                          | 170               | 300-600          | 618               | 1100-2200        | 94.9                              | 161.33             | 0.85                           | 1.445           | 0.51                               | 0.867               | 0.09               | 6.09-12.85       | 0.2       | 0.67-2.01        | 0.51      | 0.52-2.16        | (-)                |
| PID023  | F   | 17Y   | PIK3CD          | Hyper IgM syndrome                            | 52                | 300-500          | 820               | 1300-2200        | 17.1                              | 8.892              | 17.1                           | 8.892           | 14.5                               | 7.54                | 5.81 <sup>#</sup>  | 7.54-16.62       | 36.86     | 0.72-2.28        | 6.64      | 0.89-3.24        | (-)                |
| PID024  | M   | 5Y7M  | Unknown         | agammaglobulinemia                            | 176               | 300-600          | 1758              | 1500-2900        | 90                                | 158.4              | 1.37                           | 2.4112          | 2.62                               | 4.6112              | ND                 | 4.95-12.74       | 0.04      | 0.65-2.01        | 0.08      | 0.33-1.89        | (-)                |
| PID025  | M   | 1Y11M | Unknown         | Recurrent fever                               | 750               | 300-600          | 2572              | 1500-2900        | 94.3                              | 707.25             | 1.56                           | 11.7            | 1.42                               | 10.65               | 8.15 <sup>#</sup>  | 5.52-11.46       | 0.33      | 0.60-2.12        | 0.3       | 0.06-0.74        | (-)                |
| PID026  | F   | 1Y5M  | ADA2            | Autoinflammatory; fever; skin rash            | 1192              | 300-600          | 1482              | 1500-2900        | 88.9                              | 1059.688           | 2.63                           | 31.3496         | 4.69                               | 55.9048             | 9.96 <sup>#</sup>  | 5.52-11.46       | 1.99      | 0.60-2.12        | 1.21      | 0.06-0.74        | (-)                |
| PID027  | F   | 5M    | Unknown         | Agranulocytosis; inflammatory                 | 725               | 300-800          | 2485              | 2800-3500        | 8.15                              | 59.0875            | 0.47                           | 3.4075          | 1.39                               | 10.0775             | 7.47               | 3.70-8.30        | 0.9       | 0.33-1.25        | 0.36      | 0.14-0.50        | (-)                |
| PID028  | M   | 5Y    | Unknown         | Eosinophilia                                  | 422               | 300-600          | 2478              | 1500-2900        | 84.1                              | 354.902            | 4.91                           | 20.7202         | 6.23                               | 26.2906             | 14.39              | 4.95-12.74       | 1.14      | 0.65-2.01        | 2.09      | 0.33-1.89        | (-)                |
| PID029* | M   | 2M    | Unknown         | SCID                                          | 2.17              | 300-800          | 6.7               | 1800-3300        | 1.6                               | 0.03472            | 44.8                           | 0.97216         | 19.2                               | 0.41664             | 4.15               | 3.70-8.30        | 0.05      | 0.33-1.25        | 0.03      | 0.14-0.50        | (-)                |
| PID030  | M   | 5M    | Unknown         | Recurrent fever                               | 1105              | 300-800          | 1346              | 1800-3300        | 97                                | 1071.85            | 0.83                           | 9.1715          | 0.69                               | 7.6245              | 15.77              | 3.70-8.30        | 1.26      | 0.33-1.25        | 0.08      | 0.14-0.50        | (-)                |
| PID031  | M   | 9M    | Unknown         | Recurrent severe infections                   | 452               | 300-800          | 1956              | 1800-3300        | 93.7                              | 423.524            | 2.45                           | 11.074          | 1.68                               | 7.5936              | 8.58               | 4.95-12.74       | 1.51      | 0.65-2.01        | 0.46      | 0.33-1.89        | UD                 |
| PID032  | M   | 1Y    | BTK             | XLA                                           | 1.9               | 300-600          | 4257              | 1500-2900        | 62.5                              | 1.1875             | 28.1                           | 0.5339          | 6.25                               | 0.11875             | ND                 | 5.52-11.46       | 0.08      | 0.60-2.12        | 0.02      | 0.06-0.74        | (-)                |
| PID033  | M   | 1Y    | BTK             | XLA                                           | 7                 | 300-600          | 4965              | 1500-2900        | 93.6                              | 6.552              | 5.32                           | 0.3724          | 1.06                               | 0.0742              | 9.41 <sup>#</sup>  | 5.52-11.46       | 0.08      | 0.60-2.12        | 0.25      | 0.06-0.74        | UD                 |
| PID034  | M   | 2Y10M | Unknown         | Recurrent infections                          | 837               | 300-600          | 2268              | 1500-2900        | 90.4                              | 756.648            | 6.25                           | 52.3125         | 2.25                               | 18.8325             | 27.1 <sup>#</sup>  | 5.52-11.46       | 0.67      | 0.60-2.12        | 2.31      | 0.06-0.74        | (-)                |
| PID035* | F   | 5Y10M | Unknown         | Recurrent infections                          | 258               | 300-600          | 2688              | 1900-2900        | 59.5                              | 153.51             | 12.3                           | 31.734          | 18.3                               | 47.214              | 14.39              | 4.95-12.74       | 1.34      | 0.65-2.01        | 2.9       | 0.33-1.89        | UD                 |
| PID036  | F   | 3Y7M  | Unknown         | Recurrent infections                          | 379               | 300-600          | 1889              | 1900-2900        | 81.6                              | 309.264            | 6.66                           | 25.2414         | 6.79                               | 25.7341             | 9.4                | 4.95-12.74       | 0.98      | 0.65-2.01        | 0.77      | 0.33-1.89        | UD                 |
| PID037* | F   | 3M    | RAG1            | SCID                                          | 0.79              | 300-800          | 0.4               | 2800-3500        | 36.4                              | 0.28756            | 36.4                           | 0.28756         | 27.3                               | 0.21567             | 7.75               | 3.70-8.30        | 0.06      | 0.33-1.25        | 0.04      | 0.14-0.50        | UD                 |
| PID038  | F   | 1M    | IKBKG           | Skin rash; Recurrent infections               | 1507              | 300-800          | 3603              | 2800-3500        | 94.2                              | 1419.594           | 1.78                           | 26.8246         | 1.32                               | 19.8924             | 8.2                | 3.70-8.30        | 1.25      | 0.33-1.25        | 0.33      | 0.14-0.50        | UD                 |
| PID039  | M   | 6Y    | SH2D1A          | XLP                                           | 920               | 300-600          | 3984              | 1500-2900        | 96.1                              | 884.12             | 0.59                           | 5.428           | 0.3                                | 2.76                | 5.4 <sup>#</sup>   | 4.95-12.74       | 0.12      | 0.65-2.01        | 0.18      | 0.33-1.89        | UD                 |
| PID040  | M   | 1Y3M  | BTK             | XLA                                           | 8.32              | 300-800          | 1836              | 1500-2900        | 89.6                              | 7.45472            | 6.25                           | 0.52            | 0                                  | 0                   | 5.4 <sup>#</sup>   | 5.52-11.46       | 0.06      | 0.60-2.12        | 0.12      | 0.06-0.74        | UD                 |
| PID041  | M   | 2M    | Unknown         | SCID                                          | 1082              | 300-600          | 11.3              | 1800-3300        | 97.7                              | 1057.114           | 0.32                           | 3.4624          | 0.034                              | 0.36788             | 11.7 <sup>#</sup>  | 3.70-8.30        | 0.18      | 0.33-1.25        | 0.04      | 0.14-0.50        | UD                 |
| PID042  | M   | 2Y11M | Unknown         | Recurrent infections                          | 756               | 300-600          | 2782              | 1500-2900        | 80                                | 604.8              | 4.45                           | 33.642          | 8.47                               | 64.0332             | 7.47               | 5.52-11.46       | 1.15      | 0.60-2.12        | 0.47      | 0.06-0.74        | UD                 |
| PID043  | F   | 5M    | RAG1            | SCID                                          | 42                | 300-800          | 727               | 2800-3500        | 12.6                              | 5.292              | 30.5                           | 12.81           | 54.6                               | 22.932              | 14.39 <sup>#</sup> | 3.70-8.30        | 1.42      | 0.33-1.25        | 0.27      | 0.14-0.50        | UD                 |
| PID044  | M   | 8Y    | Unknown         | Agammaglobulinemia; agranulocytosis           | 9.63              | 300-600          | 475.8             | 1100-2200        | 90.6                              | 8.72478            | 3.12                           | 0.300456        | 3.12                               | 0.300456            | 4.9 <sup>#</sup>   | 6.09-12.85       | 0.19      | 0.67-2.01        | 0.33      | 0.52-2.16        | UD                 |
| PID045  | M   | 5Y2M  | CD40LG          | Hyper IgM syndrome                            | 473               | 300-600          | 2918              | 1500-2900        | 89.4                              | 422.862            | 1.03                           | 4.8719          | 1.56                               | 7.3788              | 2.9                | 4.95-12.74       | 2.62      | 0.65-2.01        | 1.98      | 0.33-1.89        | UD                 |
| PID046  | F   | 5M    | Unknown         | Recurrent infections                          | 43                | 300-800          | 407               | 2800-3500        | 90.9                              | 39.087             | 7.27                           | 3.1261          | 0                                  | 0                   | 4.7                | 3.70-8.30        | 2.6       | 0.33-1.25        | 0.8       | 0.14-0.50        | UD                 |
| PID047  | M   | 5Y    | Unknown         | Fever; encephalopathy                         | 435               | 300-600          | 426               | 1500-2900        | 86.4                              | 375.84             | 2.94                           | 12.789          | 5.67                               | 24.6645             | ND                 | 4.95-12.74       | 0.04      | 0.65-2.01        | 0.18      | 0.33-1.89        | UD                 |
| PID048  | M   | 14Y   | BTK             | Hypogammaglobulinemia                         | 1.38              | 300-500          | 1676.7            | 1100-2200        | 10                                | 0.138              | 50                             | 0.69            | 35                                 | 0.483               | 7.5 <sup>#</sup>   | 6.98-14.26       | 0.03      | 0.56-2.16        | 0.55      | 0.92-2.50        | UD                 |
| PID049  | M   | 1Y11M | MHC II          | Recurrent fever                               | 572               | 300-600          | 4119              | 1500-2900        | 90.2                              | 515.944            | 2.88                           | 16.4736         | 3.88                               |                     |                    |                  |           |                  |           |                  |                    |
